# Supplementary material
Source: PubMed Central journal article supplement (PMC4600435)

208 **Figure Legends:**

209

210 **Figure 1.** Aeroallergen sensitization and higher total IgE associated with greater  
211 numbers of exacerbations. Aeroallergen sensitization and total IgE also associated  
212 with both the number of viral exacerbations and non-viral exacerbations.

213

214

215 **Figure E1.** Virology of exacerbations.

216

217

218 **Figure E2.** Virology of exacerbations by month.

219

220

221 **Figure E3.** Severity of exacerbations by month.

222

223 **Table E1.** Characteristics of children with 0, 1, or 2 or more exacerbations.

224

225

226

227

228

229

230

231

232

233

234

235

236

237

238

239

240

241

242

243

244

245

246

247

248

249

250

251

252

253

**Table E1.**

|                                                                                         | Number of exacerbations |                  |                  | p-value |         |
|-----------------------------------------------------------------------------------------|-------------------------|------------------|------------------|---------|---------|
|                                                                                         | 0                       | 1                | 2+               | 0 vs 2+ | 1 vs 2+ |
| Number of children                                                                      | 40                      | 23               | 39               |         |         |
| Gender                                                                                  | 17F, 23M                | 7F, 16M          | 15F, 24M         | 0.71    | 0.52    |
| Maternal asthma                                                                         | 50%                     | 39%              | 51%              | 0.91    | 0.35    |
| Paternal asthma                                                                         | 33%                     | 36%              | 33%              | 1.00    | 0.81    |
| Maternal allergy                                                                        | 90%                     | 83%              | 84%              | 0.44    | 0.87    |
| Paternal allergy                                                                        | 84%                     | 75%              | 86%              | 0.78    | 0.30    |
| Aeroallergen sensitization (sIgE) year 6                                                | 60%                     | 41%              | 63%              | 0.81    | 0.14    |
| Aeroallergen sensitization (sIgE) year 11                                               | 74%                     | 44%              | 78%              | 0.73    | 0.02    |
| Total IgE year 6                                                                        | 51 [25, 126]            | 46 [9, 129]      | 96 [25, 280]     | 0.62    | 0.09    |
| Total IgE year 11                                                                       | 49 [26, 460]            | 59 [18, 228]     | 119 [44, 472]    | 0.53    | 0.04    |
| Positive skin test year 9                                                               | 56%                     | 47%              | 62%              | 0.60    | 0.29    |
| FeNO year 6                                                                             | 9.1 [7.2, 11.1]         | 5.9 [4.7, 11.0]  | 7.9 [6.1, 18.3]  | 0.74    | 0.14    |
| FeNO year 8                                                                             | 8.1 [7.0, 10.1]         | 8.9 [5.2, 20.0]  | 10.6 [7.6, 28.7] | 0.14    | 0.28    |
| FeNO year 11                                                                            | 15.0 [9.4, 24.5]        | 10.6 [8.8, 24.6] | 15.7 [8.7, 32.4] | 0.76    | 0.61    |
| Blood EOS % year 6                                                                      | 3.0 [1.0, 5.0]          | 2.5 [1.0, 4.0]   | 3.0 [1.0, 5.2]   | 0.71    | 0.96    |
| Blood EOS % year 8                                                                      | 4.0 [2.0, 5.0]          | 2.5 [1.0, 5.0]   | 4.0 [2.5, 5.5]   | 0.45    | 0.04    |
| Blood EOS % year 11                                                                     | 5.0 [2.0, 6.0]          | 4.0 [1.0, 5.2]   | 4.0 [2.0, 6.0]   | 0.69    | 0.18    |
| <i>Total IgE, FeNO, and EOS summarized as median [25<sup>th</sup>, 75<sup>th</sup>]</i> |                         |                  |                  |         |         |

Figure E1.

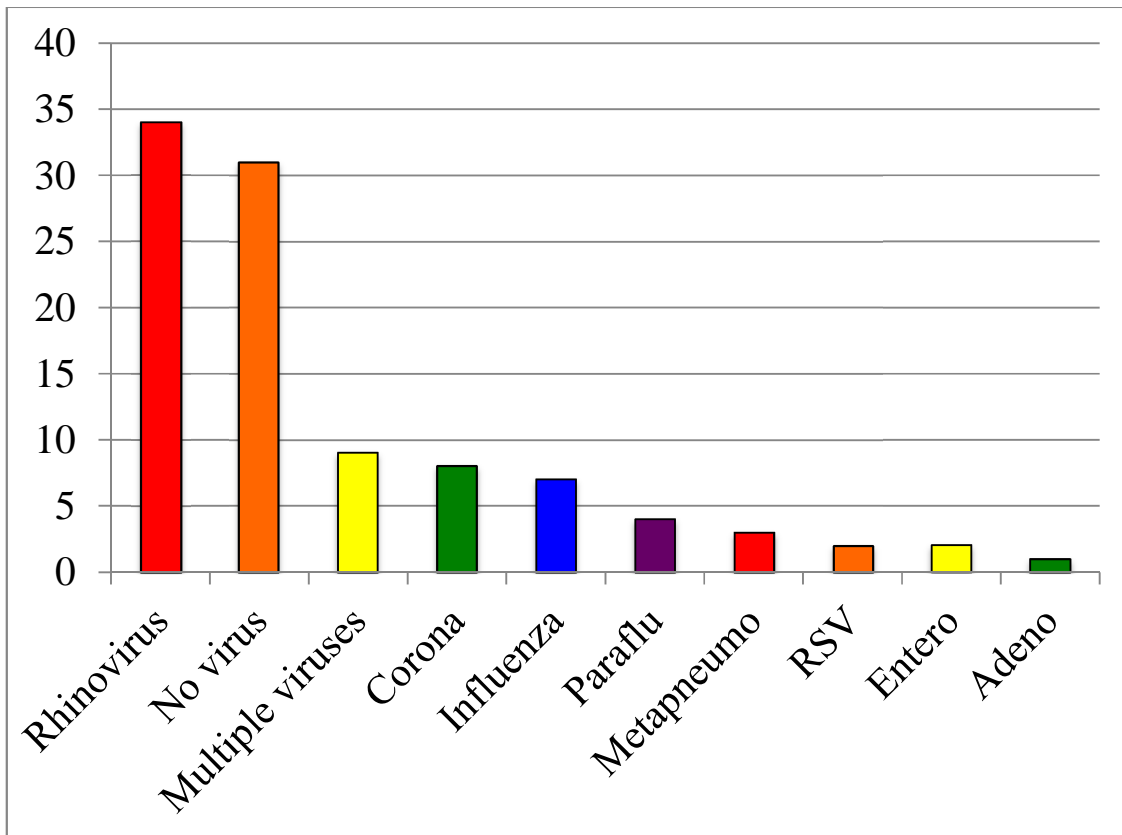

Figure E2.

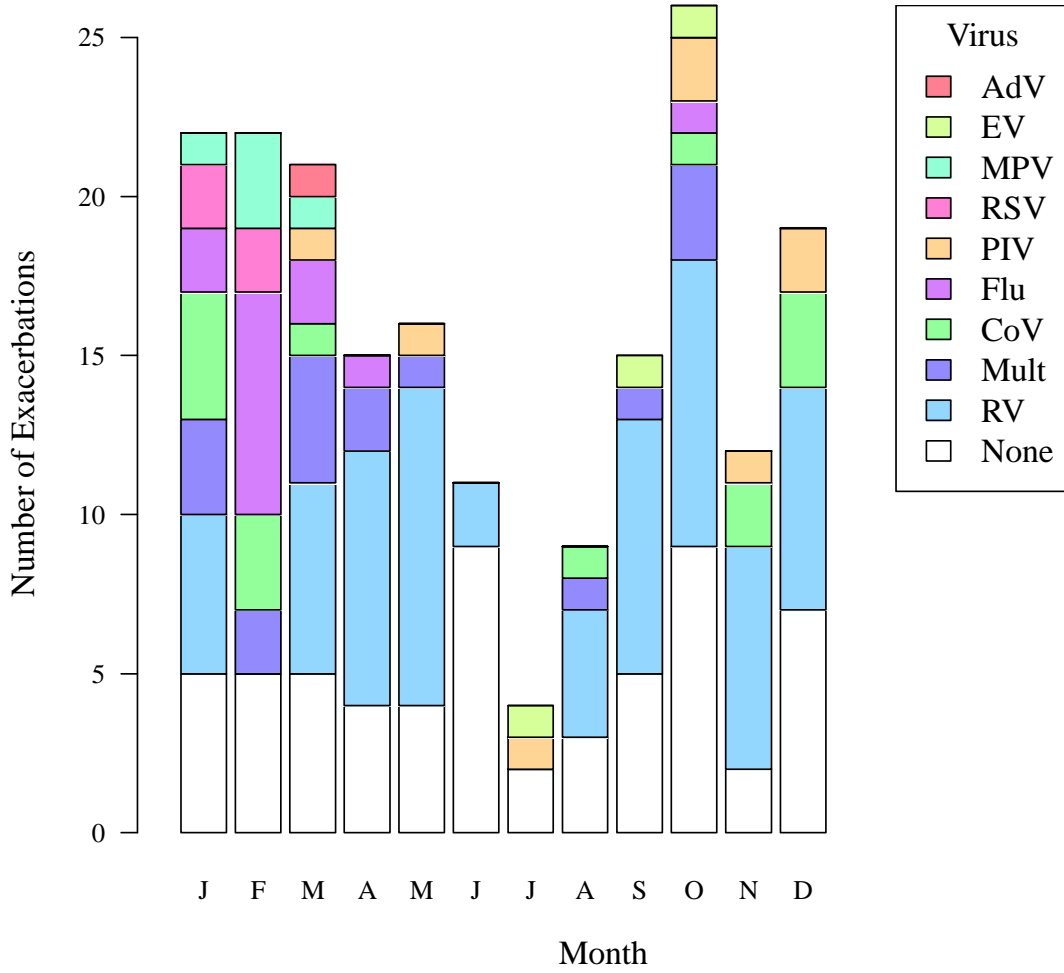

Figure E3.

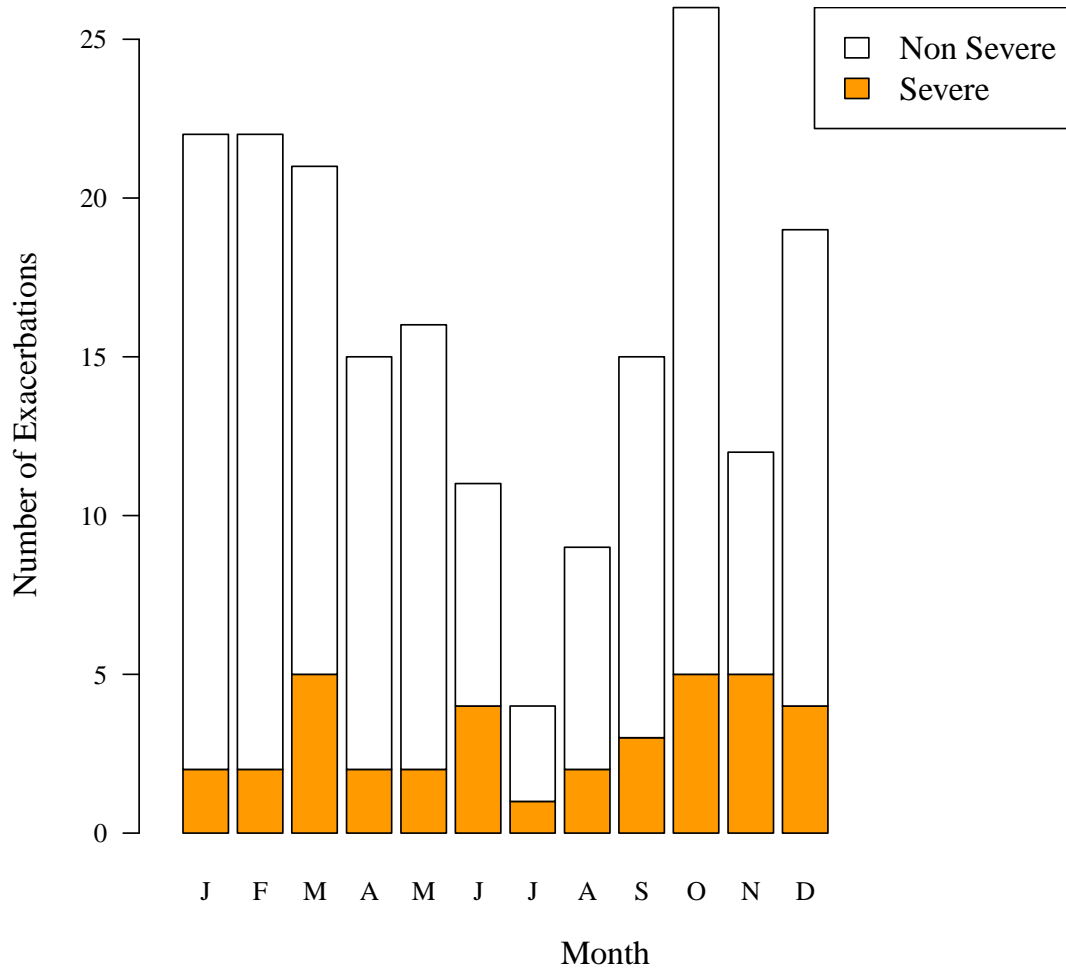

Supplement: NIHMS709406-supplement-supplement_1.pdf [file NIHMS709406-supplement-supplement_1.pdf]
